# Supplementary material for: Fertility Among Female Survivors of Childhood, Adolescent, and Young Adult Cancer: Protocol for Two Pan-European Studies (PanCareLIFE)
Source: PubMed Central journal article supplement (PMC6231763; doi:10.2196/10824), 2018-09-14
Supplement: resprot_v7i9e10824_app1.pdf [file resprot_v7i9e10824_app1.pdf]

**Multimedia Appendix 1.** Characteristics of cohorts included in the cohort study and the nested case-control study.

| Country        | Data provider or Institute                                                                                                       | Name of study cohort                                | Time period of primary diagnoses | Cancer diagnosis  | Type of data    | Total base cohort size (n) <sup>a</sup> | Number of women invited (n) | Number of questionnaires provided (n) | Number of serum samples provided (n) | Number of FSH levels provided (n) | Time period of data collection | Included in c-c study <sup>b</sup> |
|----------------|----------------------------------------------------------------------------------------------------------------------------------|-----------------------------------------------------|----------------------------------|-------------------|-----------------|-----------------------------------------|-----------------------------|---------------------------------------|--------------------------------------|-----------------------------------|--------------------------------|------------------------------------|
| Netherlands    | DCOG LATER <sup>c</sup> (Amsterdam UMC, Vrije Universiteit Amsterdam, University of Amsterdam, Erasmus Medical Center Rotterdam) | DCOG LATER cohort [17]                              | 1963-2001                        | Various diagnoses | PR <sup>d</sup> | 2190                                    | 1684                        | 1,109                                 | 619                                  | 615                               | 2004-2014                      | Yes <sup>e</sup>                   |
|                | Netherlands Cancer Institute Amsterdam                                                                                           | Hodgkin Lymphoma cohort [19, 20]                    | 1966-2000                        | Hodgkin Lymphoma  | PR              | 450                                     | 275                         | 203                                   | 0                                    | 0                                 | 1997-2016                      | No <sup>f</sup>                    |
| Germany        | Universitätsklinikum Bonn                                                                                                        | VIVE cohort                                         | 1979-2003                        | Various diagnoses | PR              | 5909                                    | 4467                        | 2,482                                 | 0                                    | 0                                 | 2014-2015                      | No                                 |
|                | Westfaelische Wilhelms-Universitaet Muenster                                                                                     | Ewing 2008 Clinical Trials cohort                   | 1999-2009                        | Ewing's sarcoma   | DU <sup>g</sup> | 161                                     | 140                         | 46                                    | 24                                   | 3                                 | 2015-2016                      | Yes                                |
|                | Charité - Universitätsmedizin Berlin                                                                                             | Berlin Hormone Analyses cohort [3]                  | 1980-2007                        | Various diagnoses | PR              | 402                                     | 344                         | 83                                    | 69                                   | 83                                | 2008-2009                      | No                                 |
| Czech Republic | Fakultni nemocnice Brno                                                                                                          | Cohort female 5-y cancer survivors Brno             | 1977-2011                        | Various diagnoses | DU              | 283                                     | 203                         | 182                                   | 180                                  | 83                                | 2015-2016                      | Yes                                |
|                | Fakultni nemocnice v Motol                                                                                                       | Cohort female 5-y cancer survivors Motol            | 1973-2011                        | Various diagnoses | DU              | 1398                                    | 1063                        | 574                                   | 301                                  | 202                               | 2014-2016                      | Yes                                |
| Italy          | Istituto Giannina Gaslini                                                                                                        | Gaslini female survivors cohort                     | 1965-2010                        | Various diagnoses | DU              | 1111                                    | 814                         | 563                                   | 122                                  | 110                               | 2015-2016                      | Yes                                |
| Switzerland    | University of Bern                                                                                                               | Swiss Childhood Cancer Survivor Study cohort 1 [18] | 1976-2005                        | Various diagnoses | PR              | 1135                                    | 977                         | 685                                   | 0                                    | 0                                 | 2007-2013                      | No                                 |
|                |                                                                                                                                  | Swiss Childhood Cancer Survivor Study cohort 2 [18] | 2006-2010                        | Various diagnoses | PR              | 335                                     | 228                         | 113                                   | 0                                    | 0                                 | 2015-2016                      | No                                 |
| United Kingdom | Great Ormond Street                                                                                                              | Hematopoietic stem                                  | 1978-2011                        | Various diagnoses | DU              | 95                                      | 93                          | 50                                    | 44                                   | 44                                | 2015-2016                      | Yes                                |

|        |                                                                 |                                                                   |           |                              |    |        |        |      |      |      |           |     |
|--------|-----------------------------------------------------------------|-------------------------------------------------------------------|-----------|------------------------------|----|--------|--------|------|------|------|-----------|-----|
|        | Children's Hospital and University College London Hospital      | cell transplantation cohort                                       |           | s                            |    |        |        |      |      |      |           |     |
| Norway | Oslo University Hospital                                        | Lymphoma survivor cohort [8]                                      | 1970-2000 | Lymphoma                     | PR | Unkown | 82     | 51   | 46   | 50   | 2007-2009 | Yes |
|        |                                                                 | Acute lymphoblastic leukemia survivor cohort [21]                 | 1970-2002 | Acute lymphoblastic leukemia | PR | 175    | 103    | 82   | 65   | 0    | 2009-2010 | Yes |
| France | University hospital Saint-Étienne                               | Rhone Alpe cohort 1                                               | 1987-1992 | Various diagnoses            | PR | 212    | 120    | 120  | 35   | 13   | 2005-2013 | Yes |
|        |                                                                 | Rhone Alpe cohort 2                                               | 1993-1999 | Various diagnoses            | PR | 284    | 220    | 102  | 62   | 0    | 2015-2016 | Yes |
| Israel | Edmond and Lily Safra Children's Hospital, Sheba Medical Center | The Edmond and Lily Safra Children's Hospital Late Effects cohort | 1981-2011 | Various diagnoses            | DU | 239    | 151    | 102  | 73   | 36   | 2015-2016 | Yes |
| Total  |                                                                 |                                                                   |           |                              |    | 14,379 | 10,964 | 6547 | 1640 | 1242 |           |     |

<sup>a</sup>Base cohort: those subjects fulfilling inclusion criteria of study.

<sup>b</sup>C-c study: case-control study.

<sup>c</sup>DCOG LATER: Dutch Childhood Oncology Group - Long term Effects after Childhood Cancer

<sup>d</sup>PR: data collected prior to PanCareLIFE project.

<sup>e</sup>Yes: institutes participating in the nested case-control study.

<sup>f</sup>No: institutes not participating in the nested case-control study.

<sup>g</sup>DU: data collected during PanCareLIFE project.
